# Supplementary material for: CD276 is an important player in macrophage recruitment into the tumor and an upstream regulator for PAI-1
Source: PubMed Central journal article supplement (PMC8295264; doi:10.1038/s41598-021-94360-9), 2021-07-21
Supplement: 41598_2021_94360_MOESM2_ESM.pdf [file 41598_2021_94360_MOESM2_ESM.pdf]

Time (day)

6

7

9

12

Spheroid<sup>WT</sup>

Spheroid<sup>CD276KO</sup>

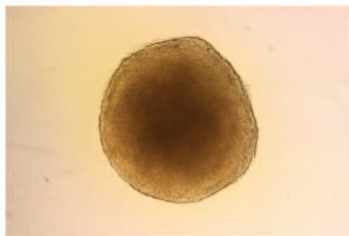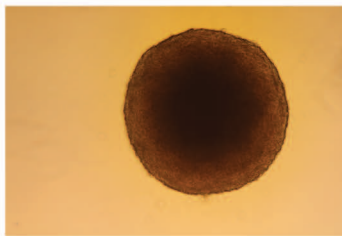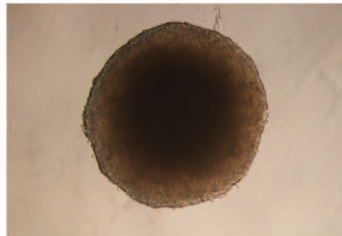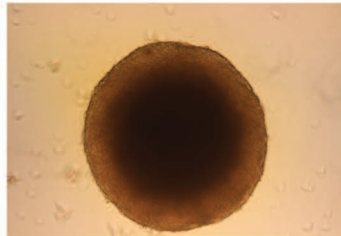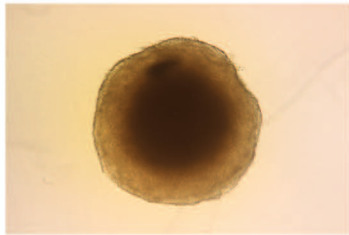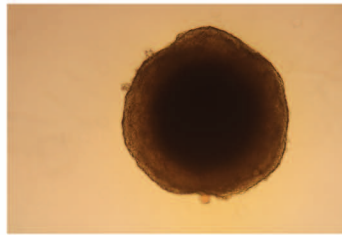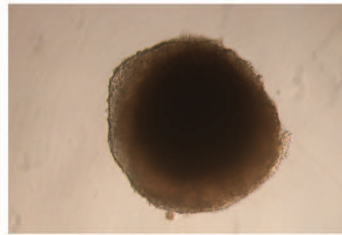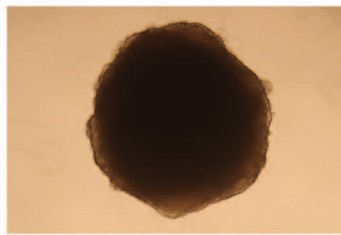

A)

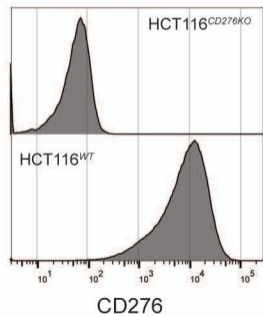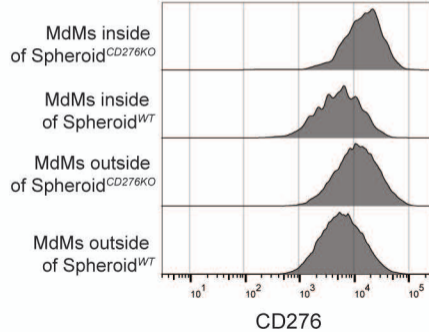

B)

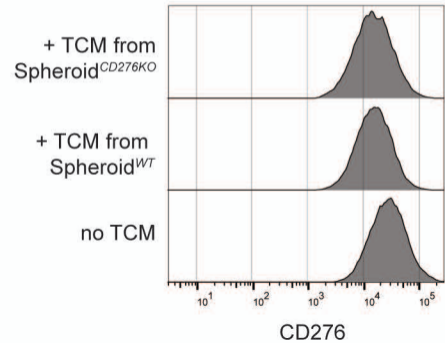

A)

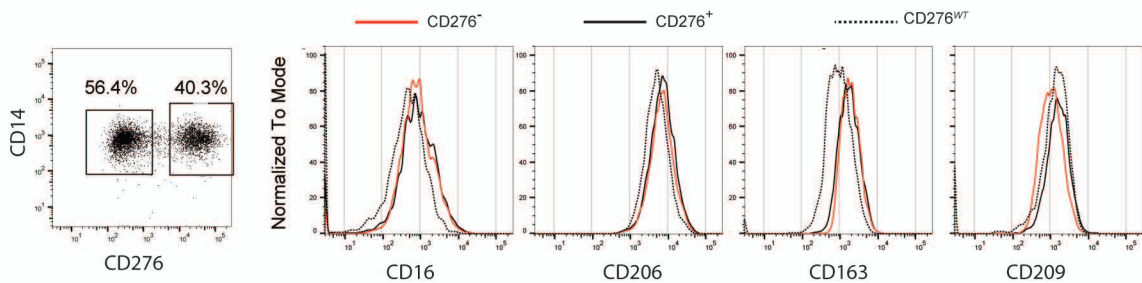

B)

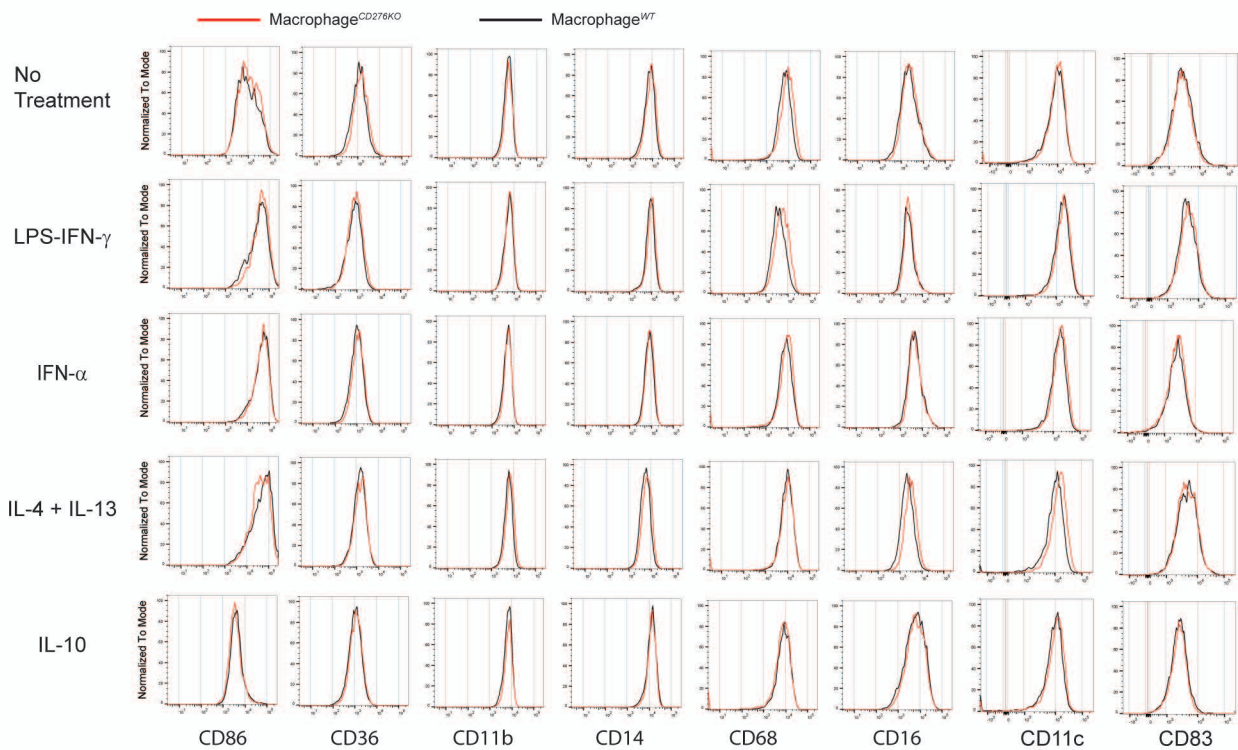

C)

MDMs (GM-CSF)

— Macrophage<sup>WT</sup>— Macrophage<sup>CD276KO</sup>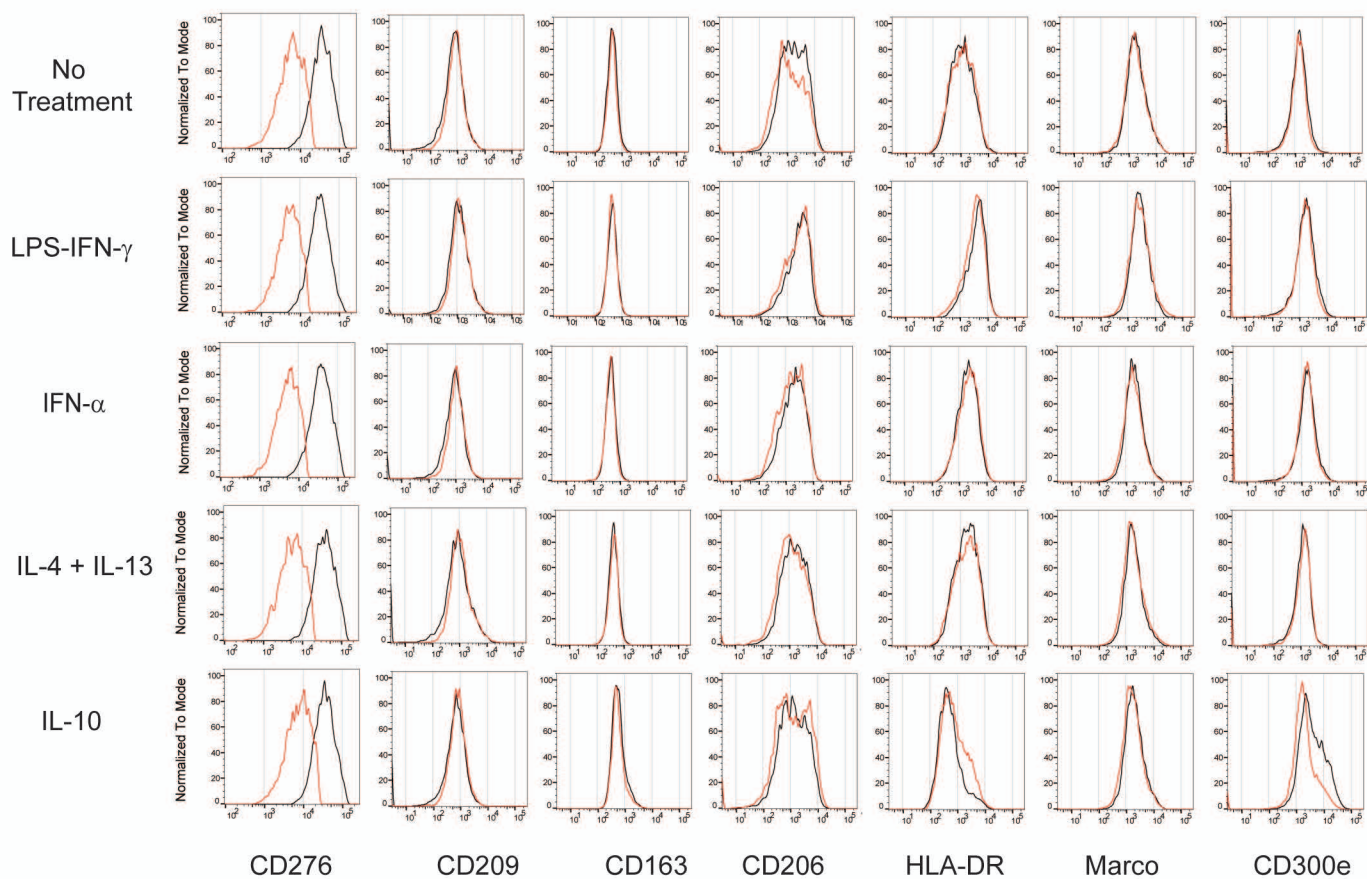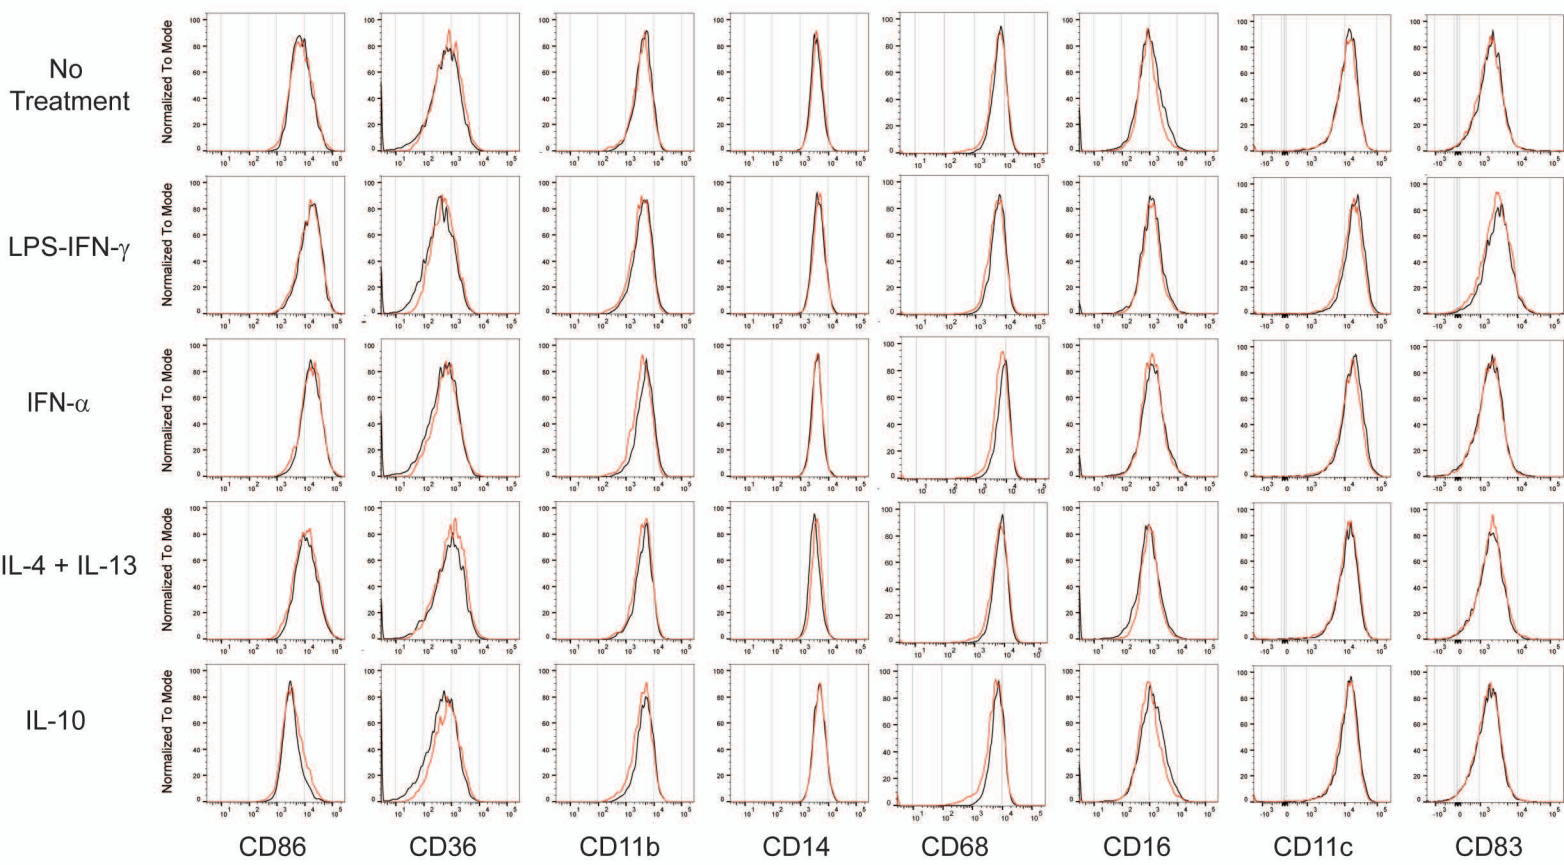

A)

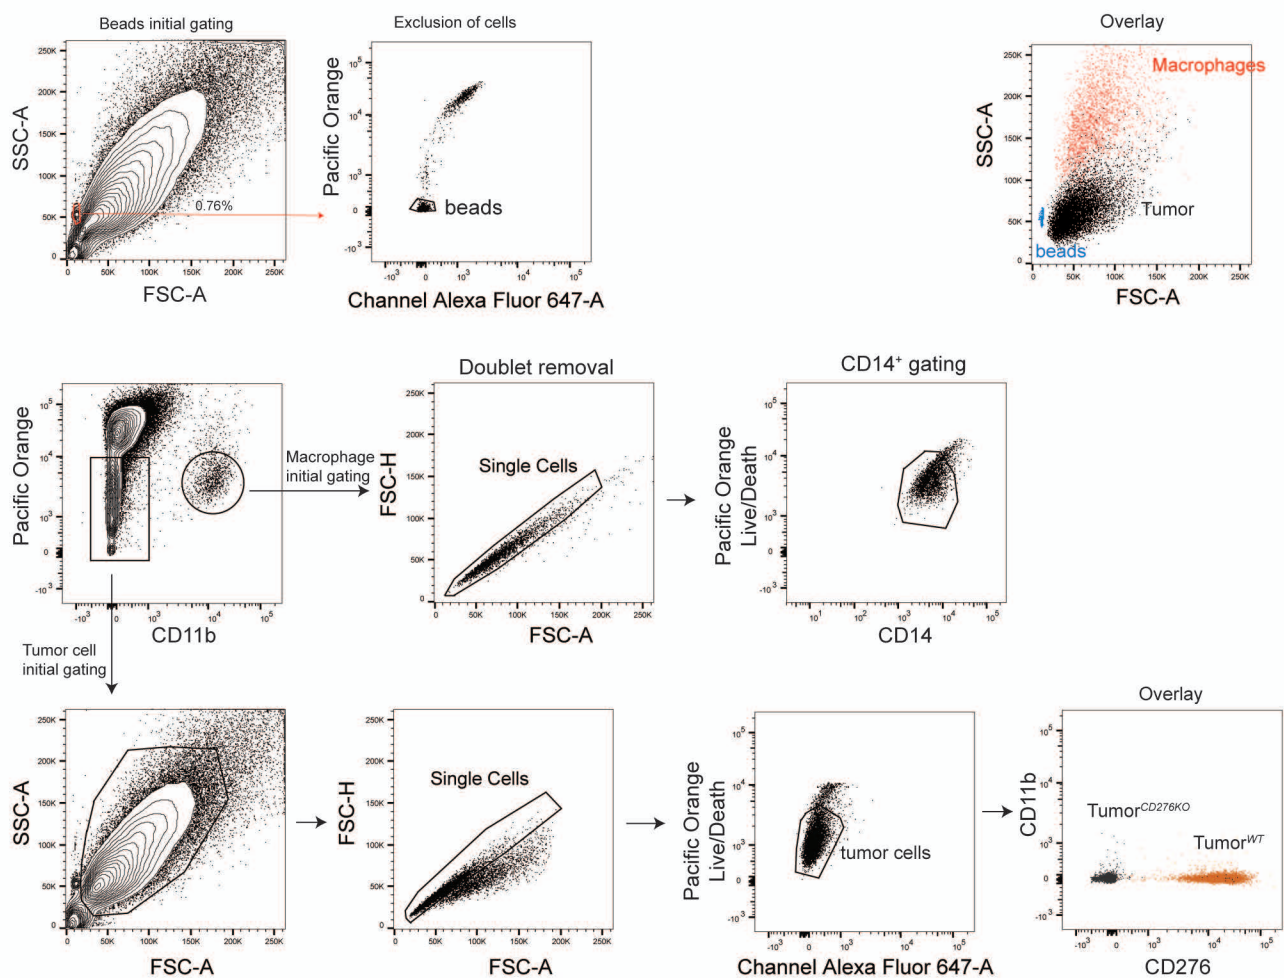

B)

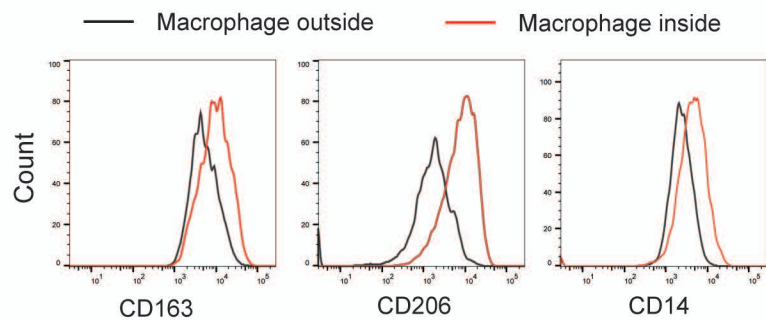

C)

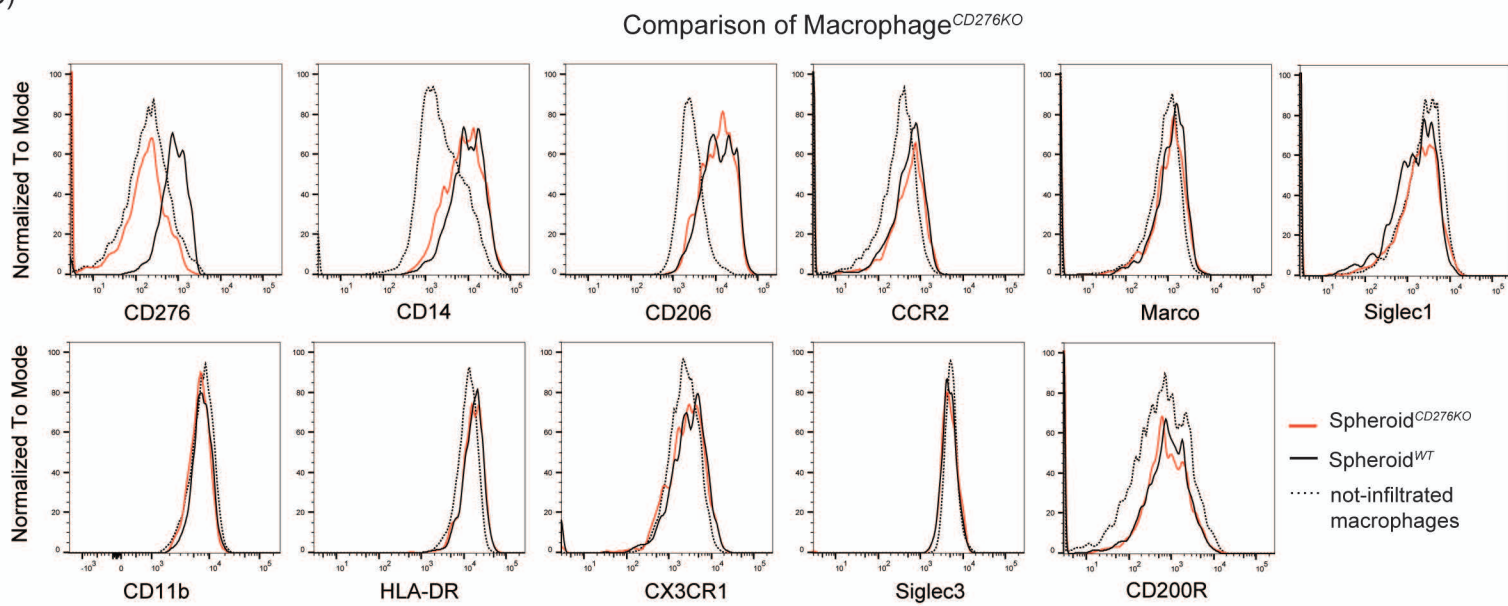

## M-CSF

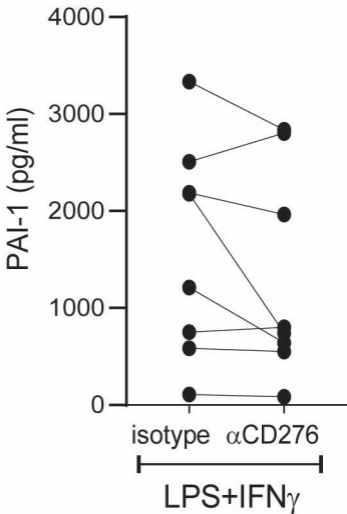

Supplementary Figure 6

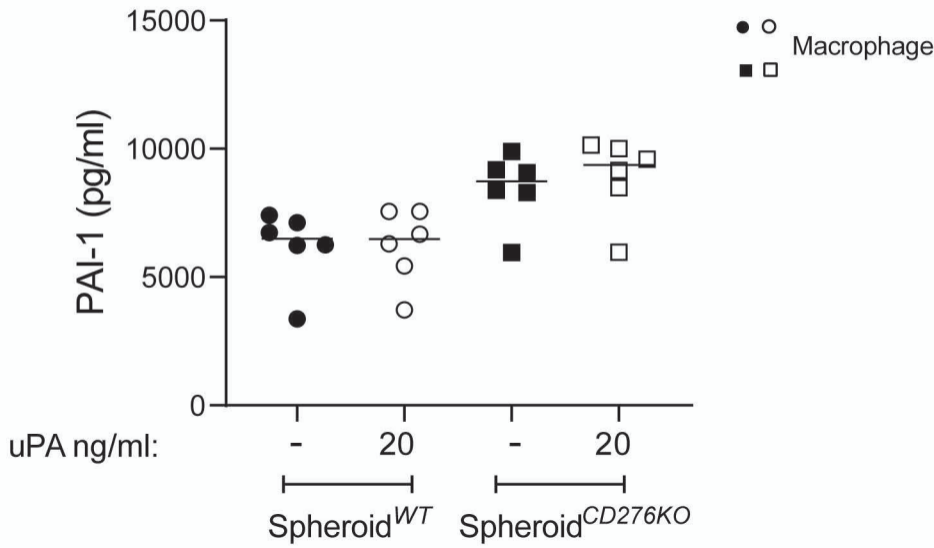

A)

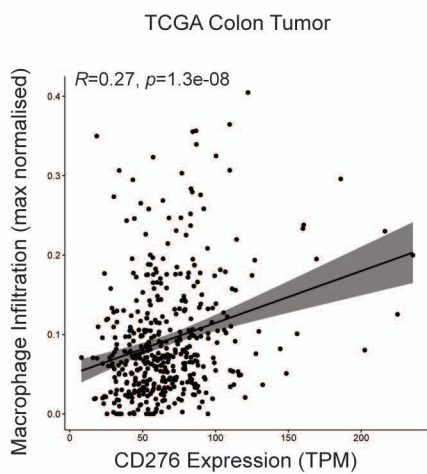

B)

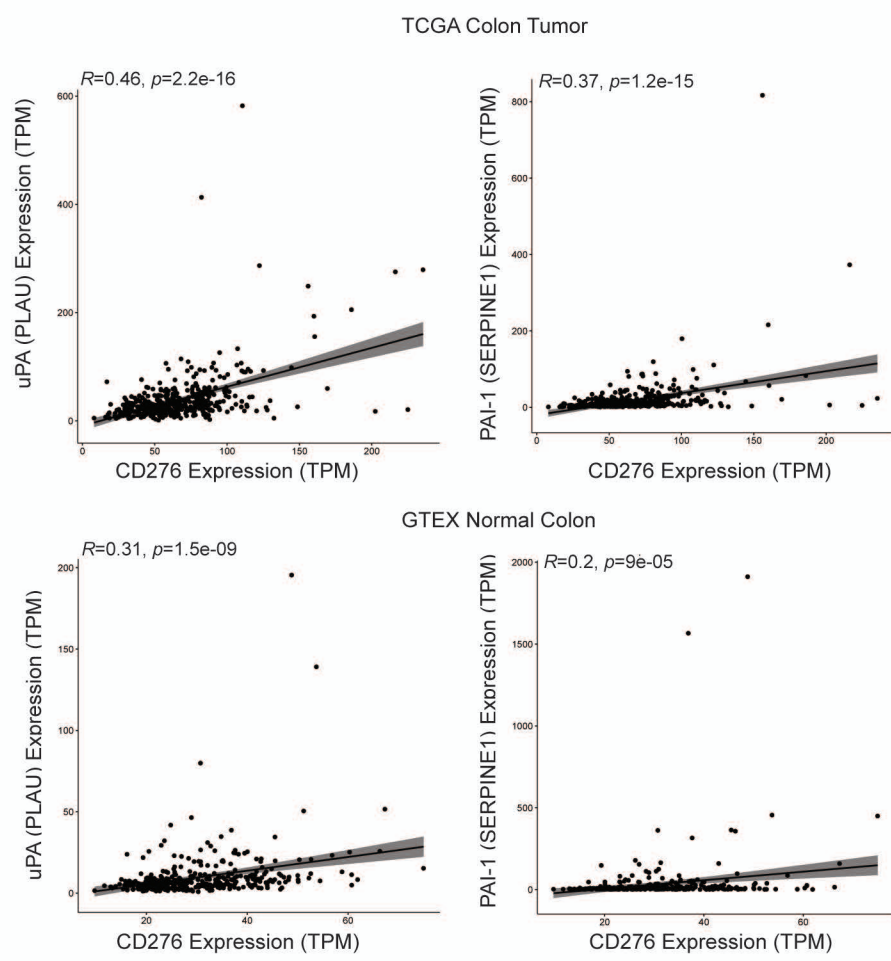

C)

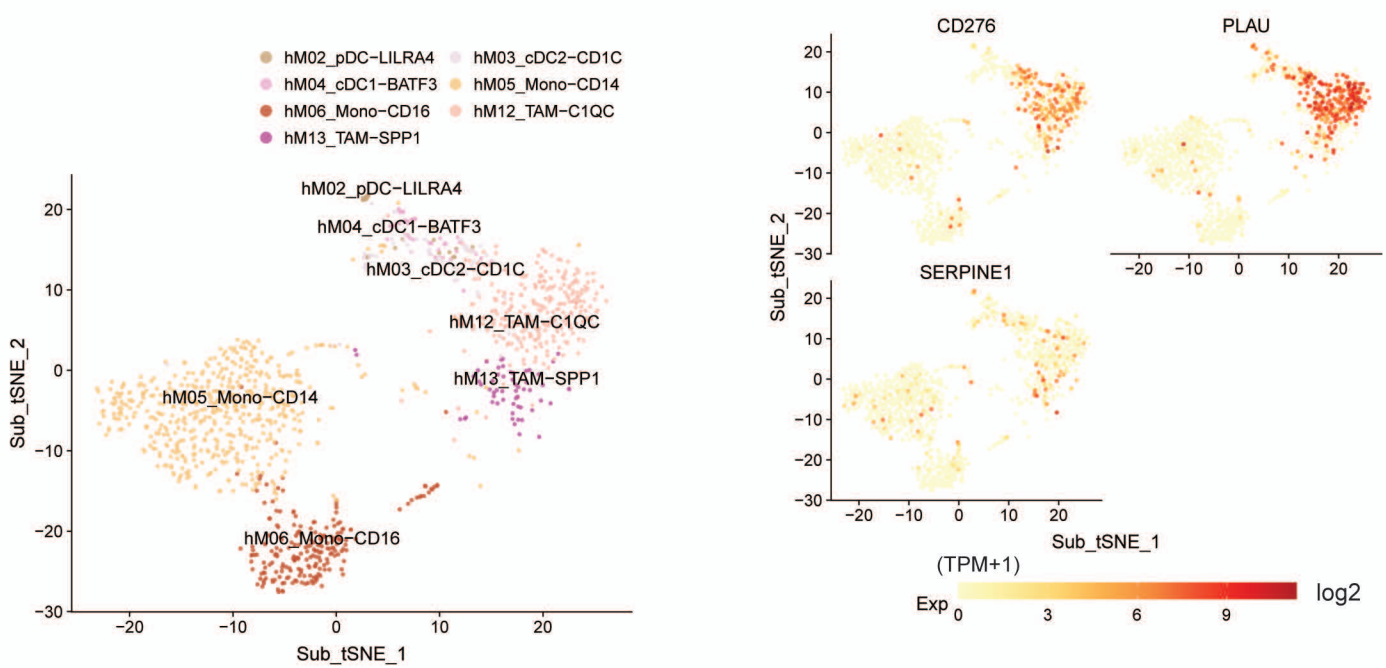

D)

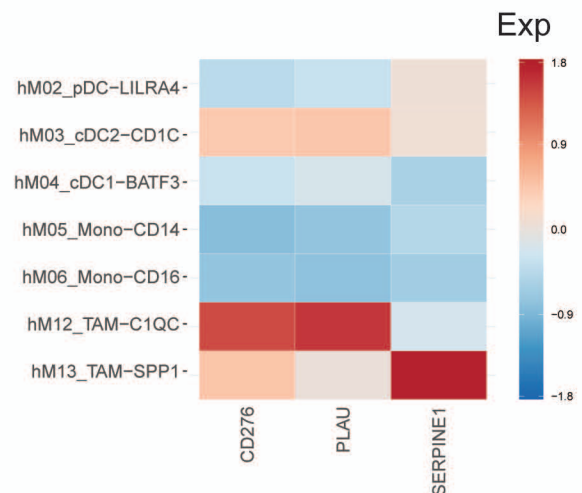



A)

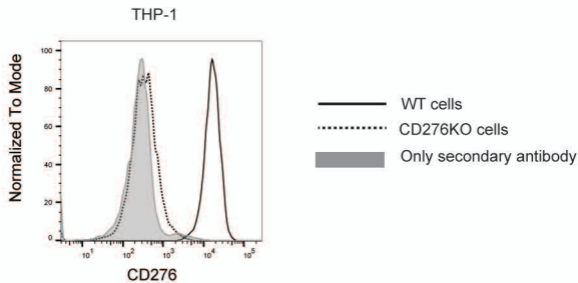

B)

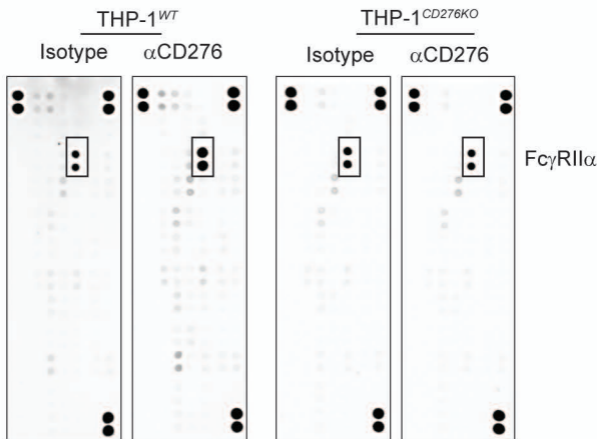

# Supplementary Fig 9

## GM-CSF Phospho-Immunoreceptor Array

---

Donor 3

Donor 4

Isotype

$\alpha$ CD276

Isotype

$\alpha$ CD276

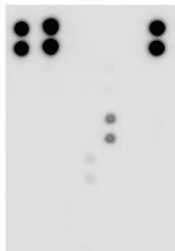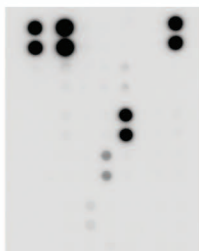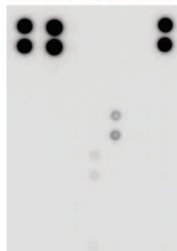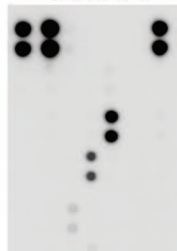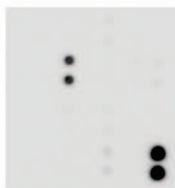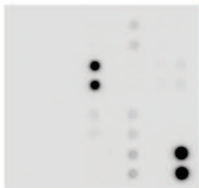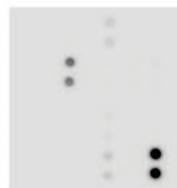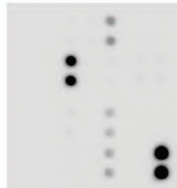

## Supplementary Figures

**Table S1: Crispr-Cas9 off-target *in silico* analysis:** The CrisprOR software (<http://crispor.tefor.net/>)<sup>34</sup> was used to predict the off-target sides for CD276 specific gRNA (TTCGTGAGCATCCGGGATTTCCGG). The table lists 66 potential off targets when up to four-mismatches are allowed. The program did not find any potential off-target with up to two-mismatches.

**Supplementary Fig 1: Monitoring spheroids over time:** HCT116<sup>WT</sup> and HCT116<sup>CD276KO</sup> cells were seeded and cultured for 5 days as described in materials and method. At day 5, medium was exchanged to serum-free medium and spheroids were cultured for additional 7 days, culturing in total 12 days. Pictures were taken with Canon Camera (EOS 1000D) attached to microscope with 5x objective magnification.

**Supplementary Fig 2: CD276 upregulation on monocyte-derived macrophages exposed to tumor cells or tumor-conditioned medium (TCM).** A) Freshly isolated monocytes were added to spheroids and cocultured. After 7 days coculture, spheroids were collected and monocyte-derived macrophages (MDMs) remaining in the wells were separately collected and pooled into one sample for each group. CD276 expression on tumor cells and MDMs inside and outside of the spheroids was analyzed by flow cytometry. B) Freshly isolated monocytes were seeded in ULA plates in 1:1 ratio for fresh medium:TCM. TCM was obtained from previously performed spheroid-monocyte cocultures, in which supernatant was collected at 7 days of coculture. The histograms in A and B represent one donor out of three MDM donors.

**Supplementary Fig 3: Lack of CD276 expression does not affect the monocyte differentiation to macrophages or the further polarization of MDMs.** A) Freshly isolated monocytes were genetically edited with Crispr-Cas9 technique either with scrambled gRNA as control (CD276<sup>WT</sup>; dotted line) or with CD276-specific gRNA. After treatment, cells were cultured in GM-CSF supplemented medium and analyzed for the surface expression of CD276, CD14, CD16, CD163, CD206 and CD209. In the representative histograms, CD276<sup>-</sup> (red line) and CD276<sup>+</sup> (black line) fractions from genetically edited sample were compared to macrophages treated with control gRNA (CD276<sup>WT</sup> dotted line). B&C) Freshly isolated monocytes were cultured for 7 days in M-CSF or GM-CSF supplemented medium. On day 7 cells were genetically edited either with scrambled gRNA as control (Macrophage<sup>WT</sup>; black line) or CD276-specific gRNA (Macrophage<sup>CD276KO</sup>; red line). 3 days after gene editing, MDMs were further treated with indicated stimuli for 24h and analyzed for indicated surface markers by flow cytometry. These histograms represent one representative donor out of three donors for B) M-CSF differentiated MDMs and C) GM-CSF differentiated MDMs.

**Supplementary Fig 4: A)** Gating strategy for infiltrated macrophages, beads and tumor cells. Pacific orange as live/dead staining agent was used to remove death cells. CD11b<sup>+</sup> live cells and CD11b<sup>-</sup> live cells were further analyzed to remove doublets. MDMs were further gated with CD14 expression. In parallel, tumor cells were further gated against pacific orange and an empty channel to avoid any dead cell contamination. Final plot indicates CD276 expression on tumor cells. **B)** Comparison of infiltrated macrophages to macrophages outside of spheroids for CD163, CD206 and CD14. Red line: Macrophages inside, black line: macrophages outside. **C)** Histograms display the surface expression of indicated markers on Macrophage<sup>CD276KO</sup> inside of Spheroid<sup>WT</sup> (black line) versus Spheroid<sup>CD276KO</sup> (red line) in comparison to not-infiltrated macrophages (CD276KO, dashed line) that were outside of the Spheroid<sup>WT</sup>. The data represent one donor from 4 donors MDMs.

**Supplementary Fig 5: PAI-1 production by MDMs (M-CSF).** Monocytes were cultured in M-CSF supplemented medium for 7 days. After 7 days culture, MDMs were treated with LPS+IFN $\gamma$  in the presence of  $\alpha$ CD276 antibody or isotype control for 24h. The graph summarizes the concentration of PAI-1 in the supernatant. Each dot represents one donor.

**Supplementary Fig 6: Addition of exogenous recombinant uPA did not affect the PAI-1 concentration in the spheroid-macrophage coculture.** Spheroids formed from HCT116<sup>WT</sup> or HCT116<sup>CD276KO</sup> cells were cocultured with macrophages (7 days cultured in M-CSF supplemented medium, no gene editing) in the presence or absence of exogenous recombinant uPA protein (20 ng/ml; ab167714, Abcam) for 4 days. At the end of the experiment, supernatants were collected and analyzed for PAI-1 concentration with ELISA. The graphs summarize the concentration of PAI-1 from 6 different MDM donors, where each dot represent one donor.

**Supplementary Figure 7: A)** Correlation of CD276 expression with macrophage signature based on analysis of colon adenocarcinoma cohort in The Cancer Genome Atlas (TCGA). **B)** Coexpression analysis of CD276 and uPA (PLAU) or PAI-1 (SERPINE1) in colon adenocarcinoma cohort in TCGA and in normal tissue samples in GTEx platform. Pearson correlation and linear regression. **C&D)** Analysis of CD276, uPA (PLAU) and PAI-1 (SERPINE1) expression in myeloid cell subsets in previously published single-cell RNAseq data set generated with Smart-seq2 platform (available at <http://cicleukocyte.cancer-pku.cn/>). The graphs represent all the data generated from matching colon tumors, adjacent normal tissue and blood samples of the same patients. Clusters' names are obtained from the original publication. hM02-hM04: plasmacytoid DC (pDC), cDC2, and cDC1 cells. Blood-enriched monocyte subsets hM05-hM07: classical CD14<sup>hi</sup>CD16<sup>-</sup>, non-classical CD14<sup>+</sup>CD16<sup>hi</sup>, and intermediate CD14<sup>hi</sup>CD16<sup>+</sup> monocytes, respectively. Tumor-associated macrophages (TAM): hM12-hM13. **C)** t-SNE plot showing 7 myeloid clusters (left) and expression levels of CD276, uPA, and PAI-1 (right). **D)** Heatmap showing expression patterns of indicated genes for the 7 myeloid clusters.

**Supplementary Fig 8: A)** HCT116<sup>WT</sup>, HCT116<sup>CD276KO</sup>, THP-1<sup>WT</sup> and THP1<sup>CD276KO</sup> cells were stained with unconjugated primary rabbit anti-human CD276 (ab209895) followed by staining with secondary anti-rabbit antibody and analyzed by flow cytometry. **B)** THP-1<sup>WT</sup> and THP-1<sup>CD276KO</sup> cells were treated with  $\alpha$ CD276 antibody for 10 min and cells lysates were prepared and processed for Phospho-Immunoreceptor array.

**Supplementary Fig 9:** The phosphor-immunoreceptor blots from Figure 5C with no correction on sharpness or contrast. After the contrast correction, the white circles around the dot blots in Figure 5C appears but this does not create or hide the detected signal.
